# Supplementary material for: Orbitofrontal neurons acquire responses to ‘valueless’ Pavlovian cues during unblocking
Source: eLife journal article supplement (doi:10.7554/elife.02653), 2014-07-18
Supplement: supp [file elife-02653-supp-v1.zip]

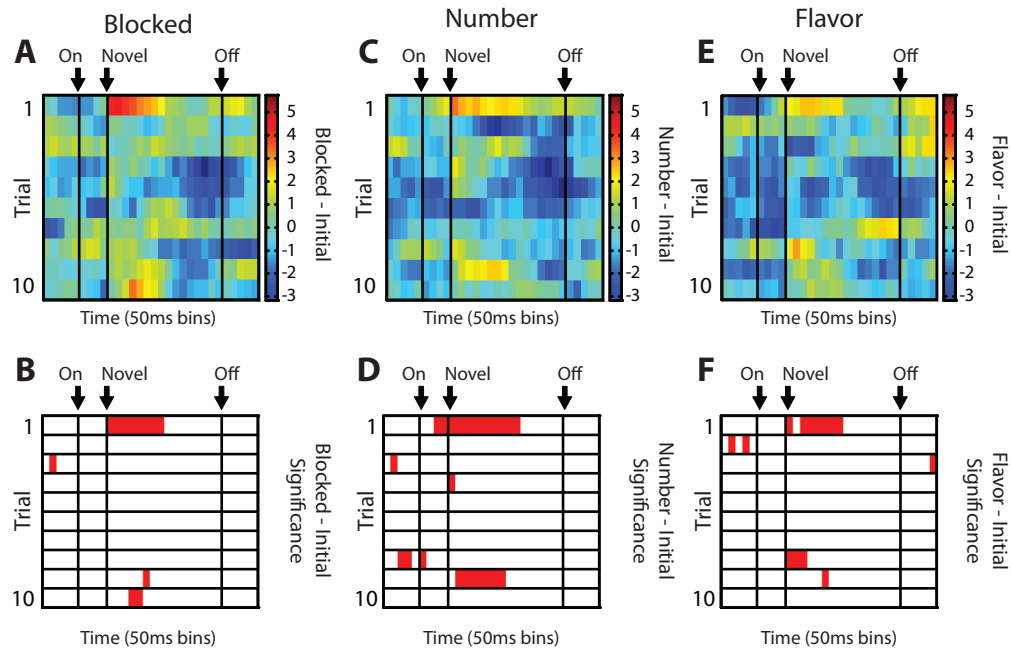

**Supplemental 3 for Figure 2.** Analyses identical to those performed in Fig. 2f,g of the main text, in which mean firing to all three novel odors was analyzed, were performed for each individual novel, odor. Separate analyses of temporal firing to (A,B) blocked vs. initial odor firing (C,D) number vs. initial odor firing and (E,F) flavor vs. initial odor firing revealed nearly identical patterns. Maximal responding is observed early on trial 1 and no or diminished responding is observed on subsequent trials.
