# Supplementary material for: Orbitofrontal neurons acquire responses to ‘valueless’ Pavlovian cues during unblocking
Source: eLife journal article supplement (doi:10.7554/elife.02653), 2014-07-18
Supplement: supp [file elife-02653-supp-v1.zip]

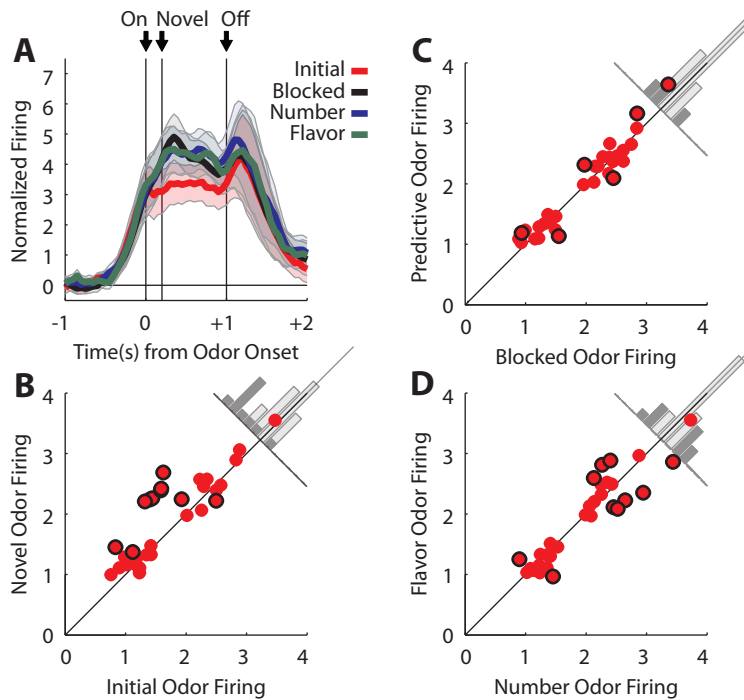

**Supplemental 2 for Figure 2.** An identical analysis of only day 1 salience neurons ( $n=31$ ) revealed nearly identical patterns as those reported when both day 1 and 2 neurons were analyzed. **(A)** ANOVA and subsequent post-hoc tests revealed identical significant results as in Fig. 2B of the main text. **(B)** Sign test for novel vs. initial odor firing differed slightly in it only approached significance ( $p = 0.07$ ). **(C,D)** All other comparisons for salience neurons were identical to those reported in the main text.
