# Supplementary material for: Orbitofrontal neurons acquire responses to ‘valueless’ Pavlovian cues during unblocking
Source: eLife journal article supplement (doi:10.7554/elife.02653), 2014-07-18
Supplement: supp [file elife-02653-supp-v1.zip]

Archive with 6 entries (6 files):
- elife_poa_e02653_Figure_1_figure_supplement_1.pdf
- elife_poa_e02653_Figure_2_figure_supplement_4.pdf
- elife_poa_e02653_Figure_2_figure_supplement_3.pdf
- elife_poa_e02653_Figure_3_figure_supplement_1.pdf
- elife_poa_e02653_Figure_2_figure_supplement_1.pdf
- elife_poa_e02653_Figure_2_figure_supplement_2.pdf
