# Supplementary material for: Orbitofrontal neurons acquire responses to ‘valueless’ Pavlovian cues during unblocking
Source: eLife journal article supplement (doi:10.7554/elife.02653), 2014-07-18
Supplement: supp [file elife-02653-supp-v1.zip]

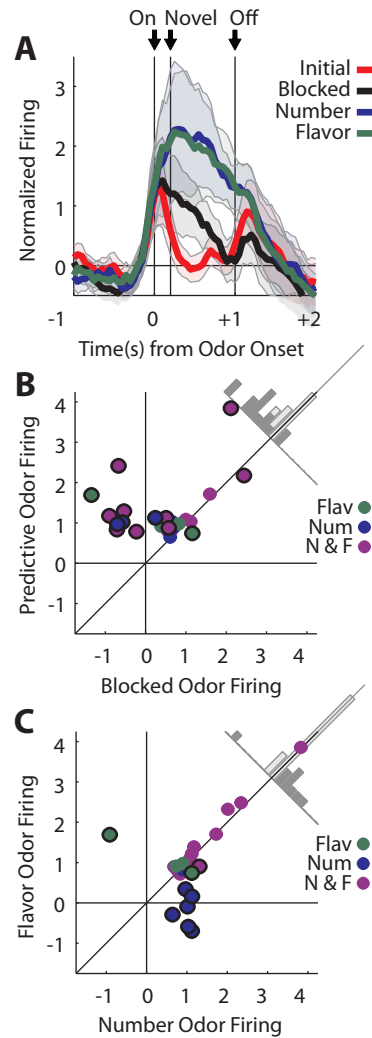

**Supplemental 1 for Figure 3.** An identical analysis of only day 1 predictive neurons revealed identical patterns as those reported when both day 1 and 2 neurons were analyzed. **(A)** ANOVA, and subsequent post-hoc tests, revealed identical significant results as those reported in Fig 3D. **(B)** Sign test comparing predictive odor firing to blocked odor firing revealed a significant bias towards the predictive odors ( $p < 0.05$ ). **(C)** Sign test comparing flavor and number odor firing found no population bias towards either odor ( $p > 0.1$ ).
