# Supplementary material for: Orbitofrontal neurons acquire responses to ‘valueless’ Pavlovian cues during unblocking
Source: eLife journal article supplement (doi:10.7554/elife.02653), 2014-07-18
Supplement: supp [file elife-02653-supp-v1.zip › elife_poa_e02653_Figure_2_figure_supplement_1.pdf]

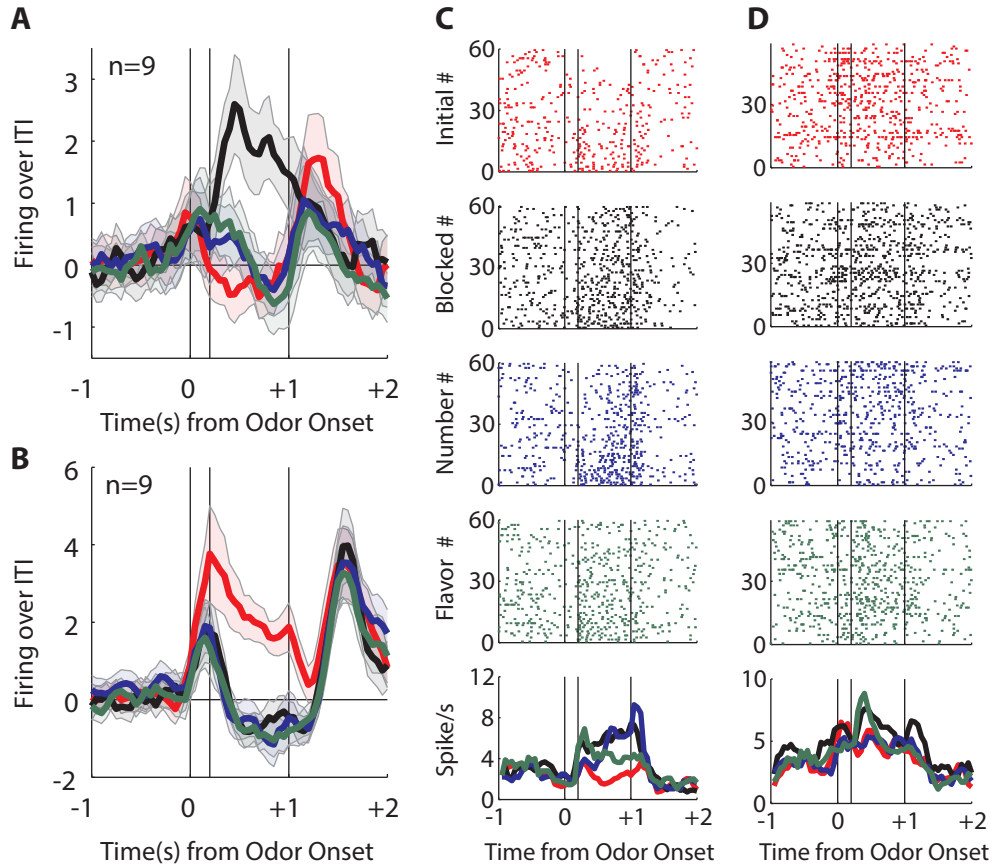

**Supplemental 1 for Figure 2.** Of the 37 units not analyzed in the main text, **(A)** 9 showed selective responding to the blocked odor and **(B)** 9 showed selective responses to the initial odor. The remaining neurons showed responses to different combinations of odors. **(C)** Neuron fired maximally to the number and blocked odors, possibly signaling predicted reward flavor, independent of number. **(D)** Neuron fired maximally to the flavor and blocked odors, possibly signaling predicted reward number, independent of flavor. However, these patterns were rare and were not reflective of the odor-responsive population.
