# Supplementary material for: Orbitofrontal neurons acquire responses to ‘valueless’ Pavlovian cues during unblocking
Source: eLife journal article supplement (doi:10.7554/elife.02653), 2014-07-18
Supplement: supp [file elife-02653-supp-v1.zip › elife_poa_e02653_Figure_2_figure_supplement_4.pdf]

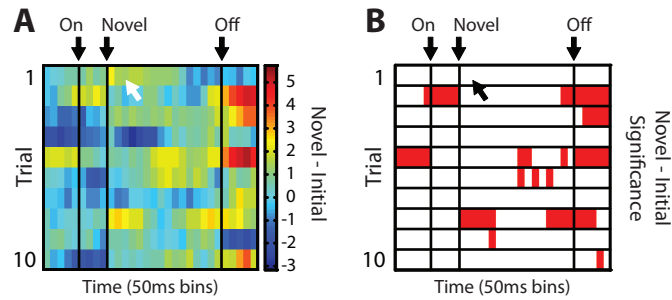

**Supplemental 4 for Figure 2.** Analyses identical to those in Fig. 2F,G of the main text were performed for salience neurons on unblocking day 2. **(A)** Salience neurons on unblocking day 2 did not show the same temporal response to the first presentation of novel odors. The white arrow indicates where maximum response was observed in unblocking day 1 neurons. **(B)** This description is confirmed by statistical analysis which found no significant increase in firing on the first presentation of day 2; but did find significance later in the odor period on subsequent trials.
